# Supplementary material
Source: MDPI journal article supplement (https://www.mdpi.com/2076-3417/12/1/249)
Supplement: s1 [file s1]

**Table S1.** Abbreviations and chemical formulae of minerals cited in the text.

| Abbreviation | Mineral         | Chemical formula                                                                        |
|--------------|-----------------|-----------------------------------------------------------------------------------------|
| Alu          | Alunogen        | $\text{Al}_2(\text{SO}_4)_3(\text{H}_2\text{O})_{12} \cdot 5\text{H}_2\text{O}$         |
| Amp          | Amphiboles      | –                                                                                       |
| Ang          | Anglesite       | $\text{PbSO}_4$                                                                         |
| Ba           | Barite          | $\text{BaSO}_4$                                                                         |
| Cc           | Calcite         | $\text{CaCO}_3$                                                                         |
| Cp           | Copiapite       | $\text{Fe}^{2+}\text{Fe}^{3+}_4(\text{SO}_4)_6(\text{OH})_2 \cdot 20\text{H}_2\text{O}$ |
| Cpy          | Chalcopyrite    | $\text{CuFeS}_2$                                                                        |
| Cq           | Coquimbite      | $\text{Fe}_2(\text{SO}_4)_3 \cdot 9\text{H}_2\text{O}$                                  |
| Ep           | Epsomite        | $\text{MgSO}_4 \cdot 7\text{H}_2\text{O}$                                               |
| Fd           | Feldspars       | –                                                                                       |
| Fh           | Ferrihydrite    | $\text{Fe}_{10}\text{O}_{14}(\text{OH})_2$                                              |
| Fs           | Phyllosilicates | –                                                                                       |
| Gn           | Galena          | $\text{PbS}$                                                                            |
| Go           | Goethite        | $\text{FeOOH}$                                                                          |
| Gy           | Gypsum          | $\text{CaSO}_4 \cdot 2\text{H}_2\text{O}$                                               |
| Hlt          | Halotrichite    | $\text{FeAl}_2(\text{SO}_4)_4 \cdot 22\text{H}_2\text{O}$                               |
| Ha           | Halite          | $\text{NaCl}$                                                                           |
| Hex          | Hexahydrite     | $\text{MgSO}_4 \cdot 6\text{H}_2\text{O}$                                               |
| Hm           | Hematite        | $\text{Fe}_2\text{O}_3$                                                                 |
| Js           | Jarosite        | $\text{KFe}_3(\text{SO}_4)_2(\text{OH})_6$                                              |
| K            | Kaolinite       | $\text{Al}_2\text{Si}_2\text{O}_5(\text{OH})_4$                                         |
| Me           | Melanterite     | $\text{FeSO}_4 \cdot 7\text{H}_2\text{O}$                                               |
| Mz           | Monazite        | $(\text{Ce}, \text{La}, \text{Nd}, \text{Sm})\text{PO}_4$                               |
| Njs          | Natrojarosite   | $\text{NaFe}_3(\text{SO}_4)_2(\text{OH})_6$                                             |
| Py           | Pyrite          | $\text{FeS}_2$                                                                          |
| Qz           | Quartz          | $\text{SiO}_2$                                                                          |
| Sph          | Sphalerite      | $\text{ZnS}$                                                                            |
| Sw           | Schwertmannite  | $\text{Fe}_8\text{O}_8(\text{OH})_6(\text{SO}_4) \cdot n\text{H}_2\text{O}$             |
| Sz           | Szomolnokite    | $\text{FeSO}_4 \cdot \text{H}_2\text{O}$                                                |
| Zr           | Zircon          | $\text{ZrSiO}_4$                                                                        |

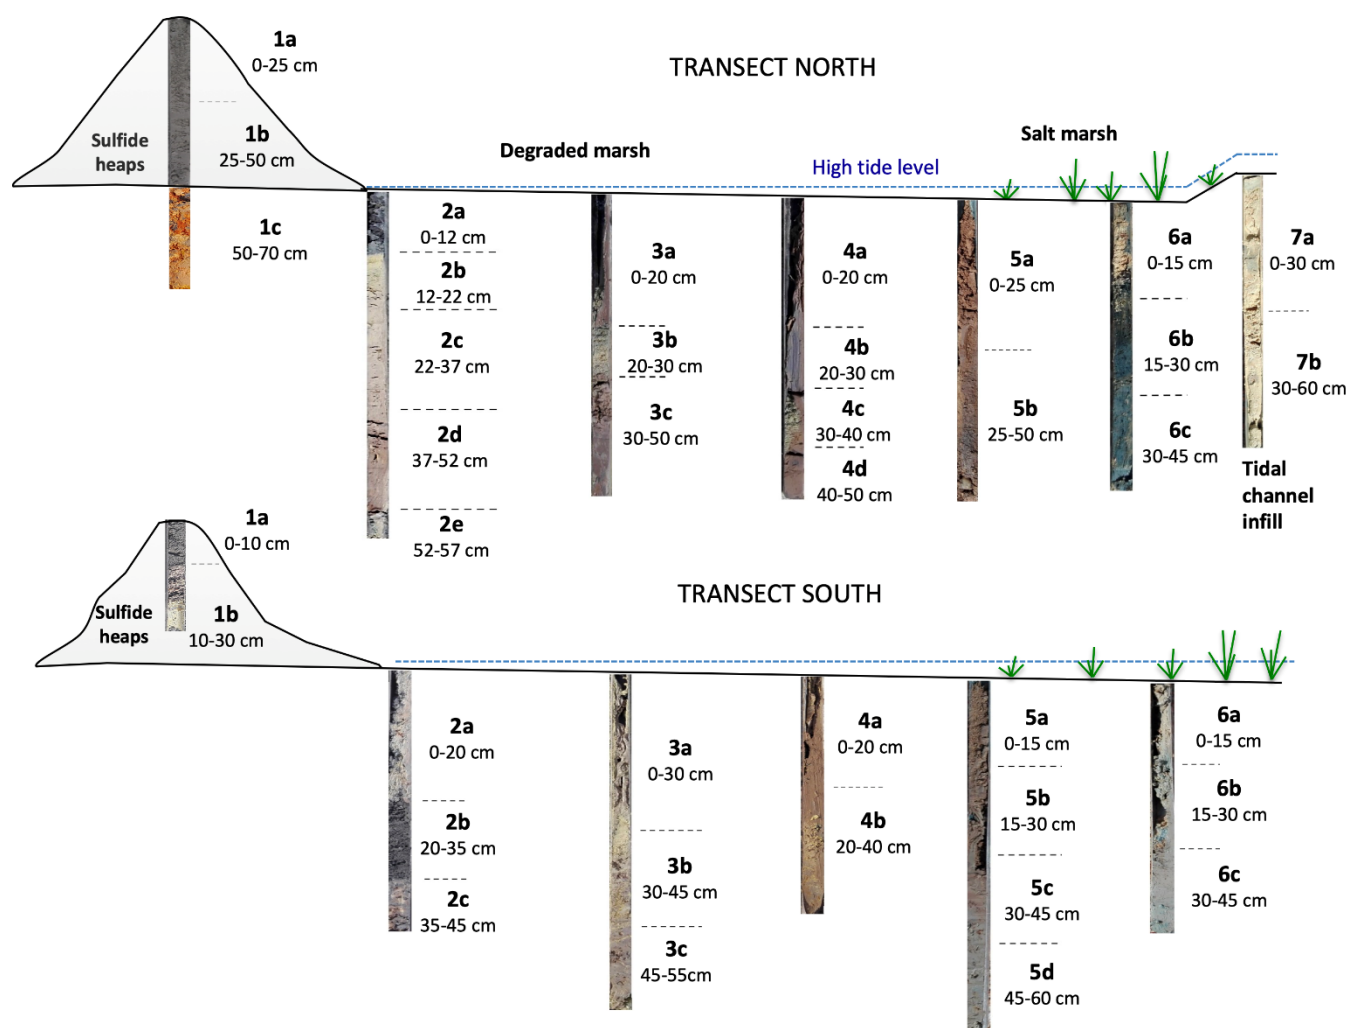

**Figure S1.** Schematic depiction of the soil sections from the extracted core samples.
